# Supplementary material for: Metabolic plasticity enables lifestyle transitions of Porphyromonas gingivalis
Source: PubMed Central journal article supplement (PMC8144566; doi:10.1038/s41522-021-00217-4), 2021-05-24
Supplement: 41522_2021_217_MOESM1_ESM.pdf [file 41522_2021_217_MOESM1_ESM.pdf]

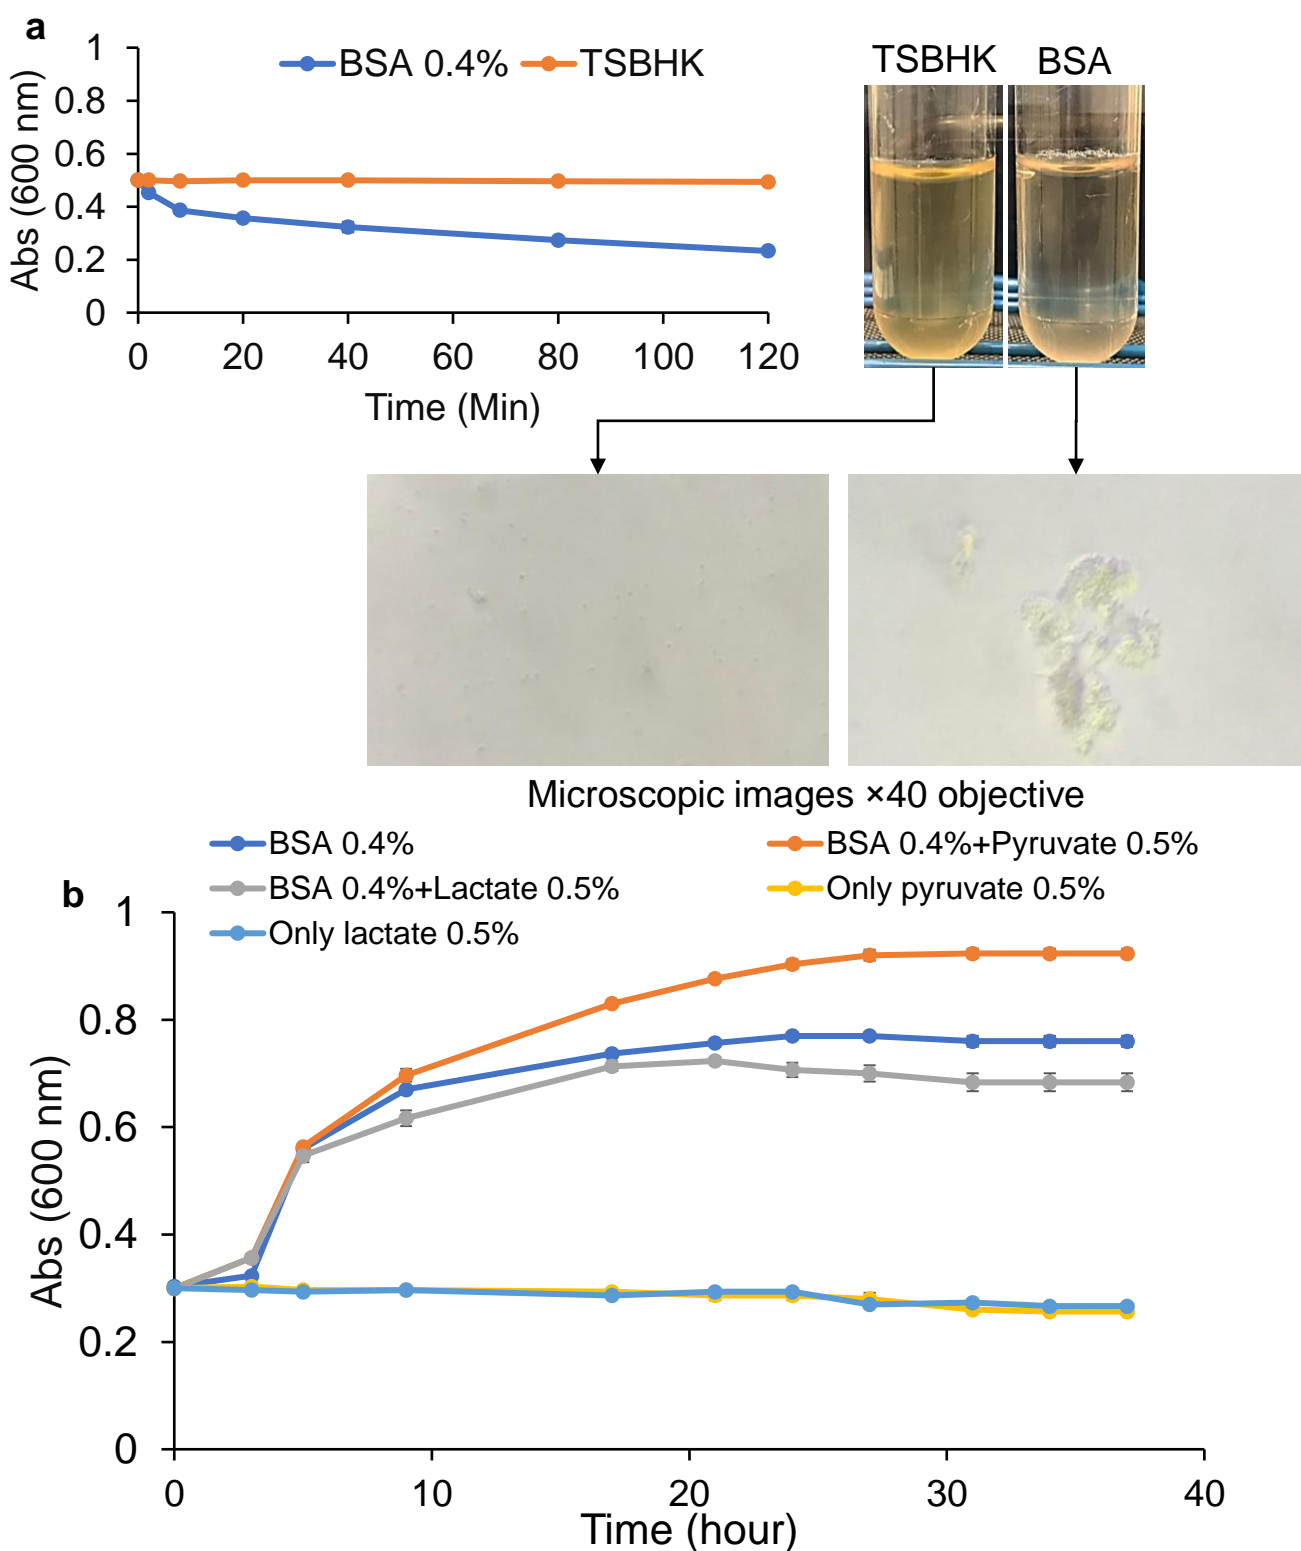

**Supplementary Figure 1** (A) Optical density measurements (left) show time-dependent settling of cells grown in BSA but not in TSBHK. The medium is turbid in TSBHK cultures but is translucent in BSA cultures (right). (B) Optical density assay ( $OD_{600}$ ) shows the effect of BSA and the monocarboxylates pyruvate and lactate on the proliferation of *P. gingivalis*. *P. gingivalis* effectively utilizes BSA for proliferation while it cannot utilize pyruvate and lactate as sole carbon and energy sources. However, in the presence of BSA, pyruvate and lactate are incorporated into the metabolism of serum components; pyruvate significantly enhances proliferation and lactate has an inhibitive effect. Graphs are created upon mean  $OD_{600} \pm$  standard error ( $n = 3$ ).

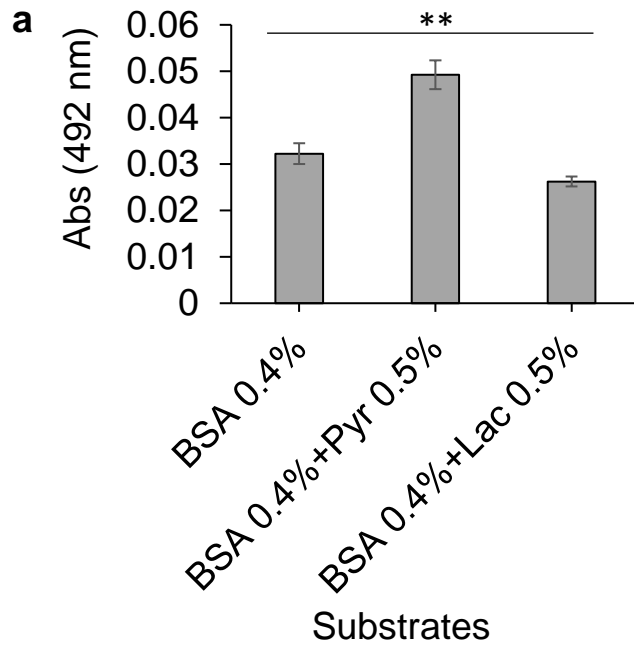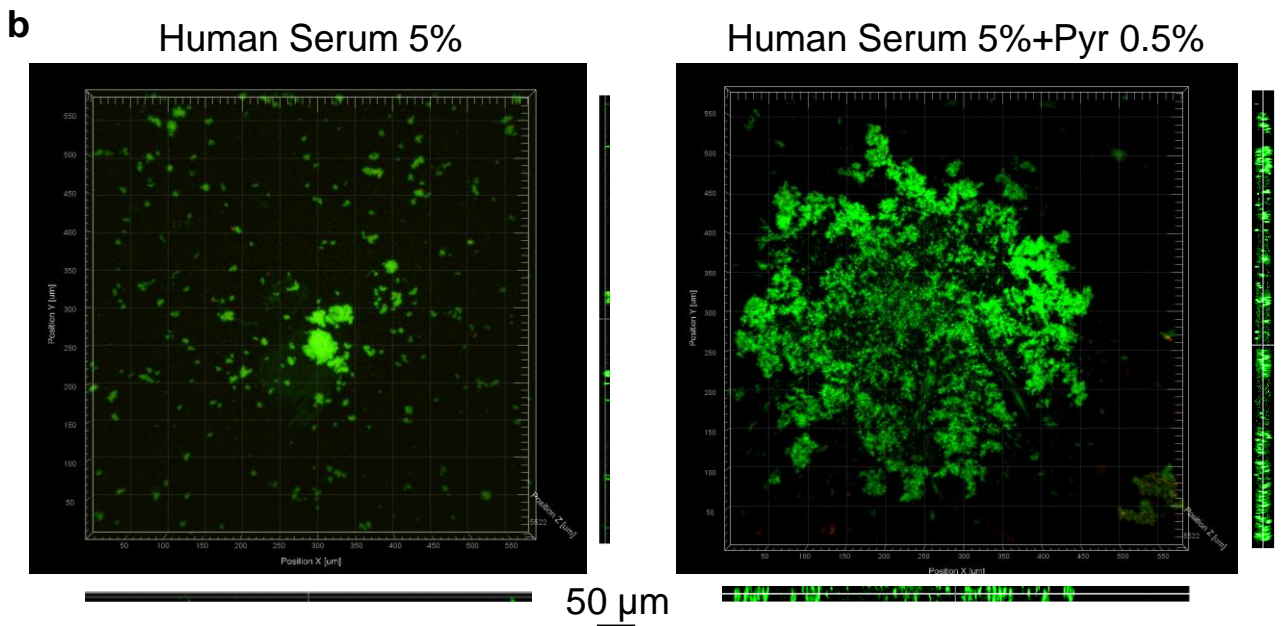

**Supplementary Figure 2** (A) Biofilm assay under microaerophilic condition shows that pyruvate significantly enhances *P. gingivalis* biofilm formation and lactate has an inhibitive effect. (B) Biofilm architecture of mutants producing acetylated and nonacetylated alginates. Images of 24-hour biofilms were acquired by CLSM. Top and side views show that pyruvate significantly promotes surface attachment and biofilm development by *P. gingivalis*.

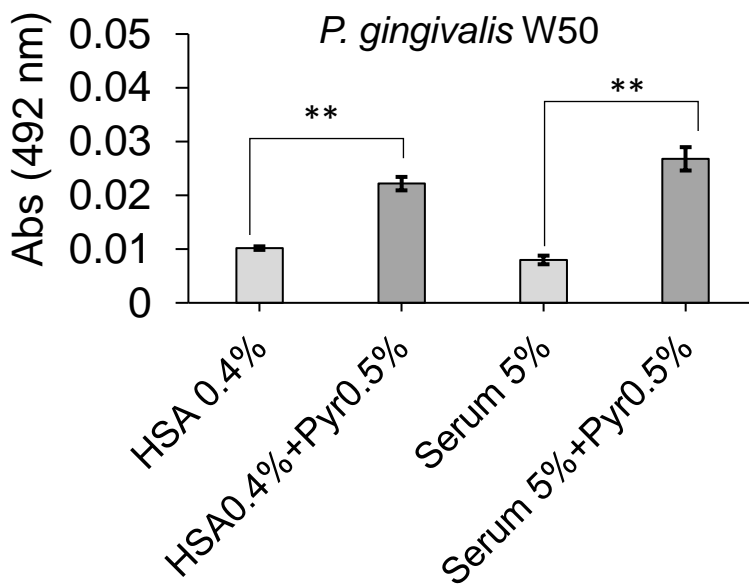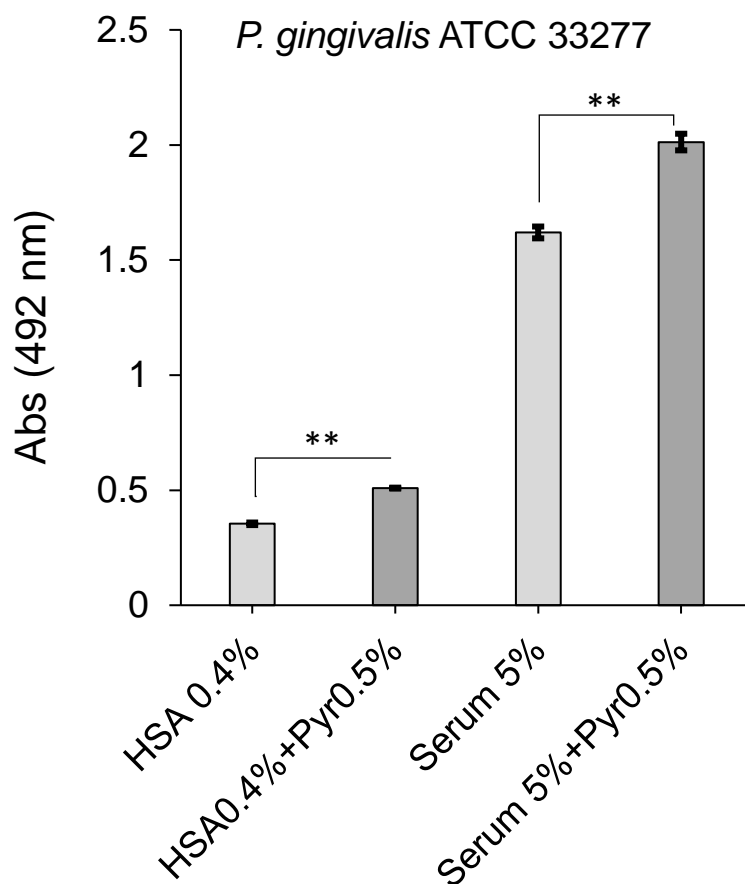

**Supplementary Figure 3** Supplementation of HSA or human serum with pyruvate enhances biofilm formation of *P. gingivalis* W50 (poor biofilm former) and ATCC 33277 (weak biofilm former). Graph represents mean biomass of biofilms  $\pm$  SE (n=5) at 48 h, as determined by safranin staining. Biofilm biomasses were normally distributed (Shapiro-Wilk test:  $P > 0.05$ ), and thus analyzed using ANOVA and asterisks indicate pairs of significantly different values (*post hoc* Tukey's HSD test: \*\*,  $p < 0.01$ ).

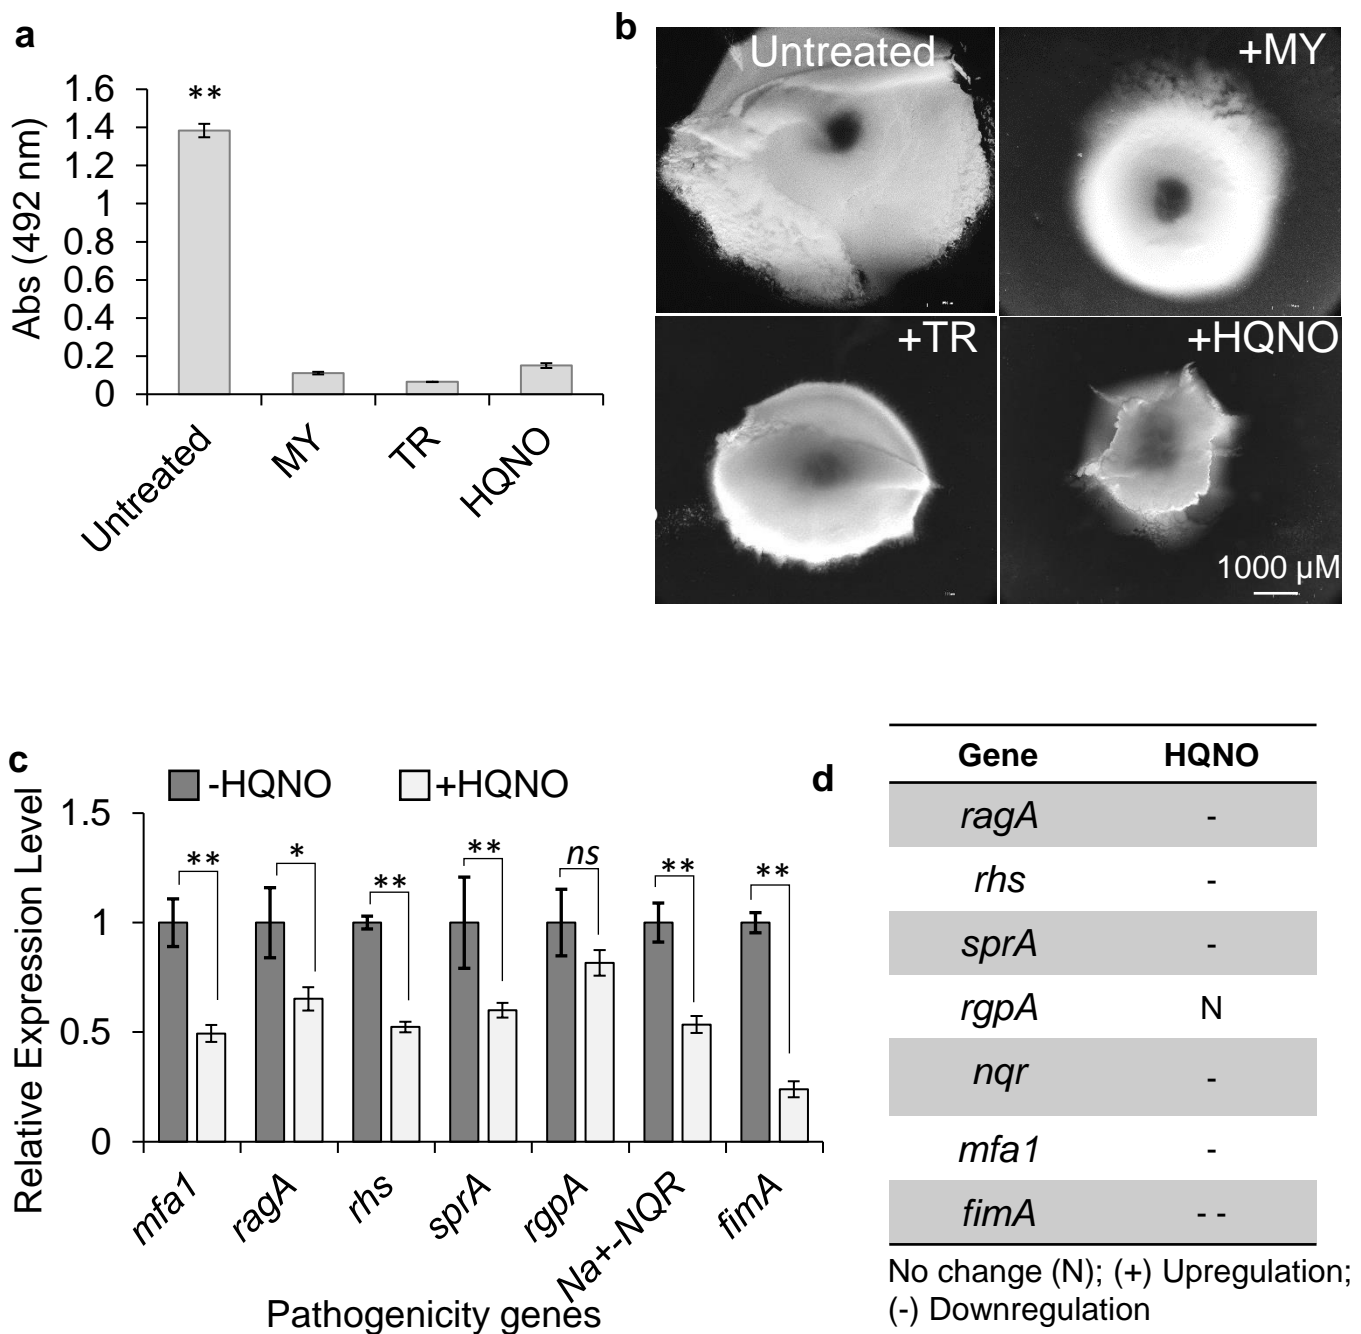

**Supplementary Figure 4** The chemical uncouplers myxothiazol (MY), trifluoperazin (TR), and 2-heptyl-4-hydroxyquinoline *N*-oxide (HQNO) (10  $\mu$ g/ml) are inhibitive to biofilm formation (A) and surface translocation (B). These assays were performed in BHI medium because it provides an optimal condition for promoting *P. gingivalis* surface translocation. (C) RT-qPCR analysis and the relative quantification of gene expression show that that despite the fact that HQNO (10  $\mu$ g/ml) reduces the expression levels of *ragA*, *rhs*, *mfa1*, *sprA*, and *nqr* genes by up to two times, *fimA* expression is downregulated by almost 5 times, indicating the expression of fimbrial adhesions is highly regulated in coordination with the bioenergetic status of the cells. (D) Table summarizes RT-qPCR results and shows the correlation of HQNO addition and the expression of pathogenicity genes. The data in graphs represent the means  $\pm$  SD error for at least four replicates, and asterisks indicate pairs of significantly different values (*post hoc* Tukey's HSD test: \*,  $P < 0.05$ ; \*\*,  $P < 0.01$ ; *ns*, not significant). Abs: absorbance; HQNO: 2-heptyl-4-hydroxyquinoline *N*-oxide; TR: trifluoperazine; MY: myxothiazol.

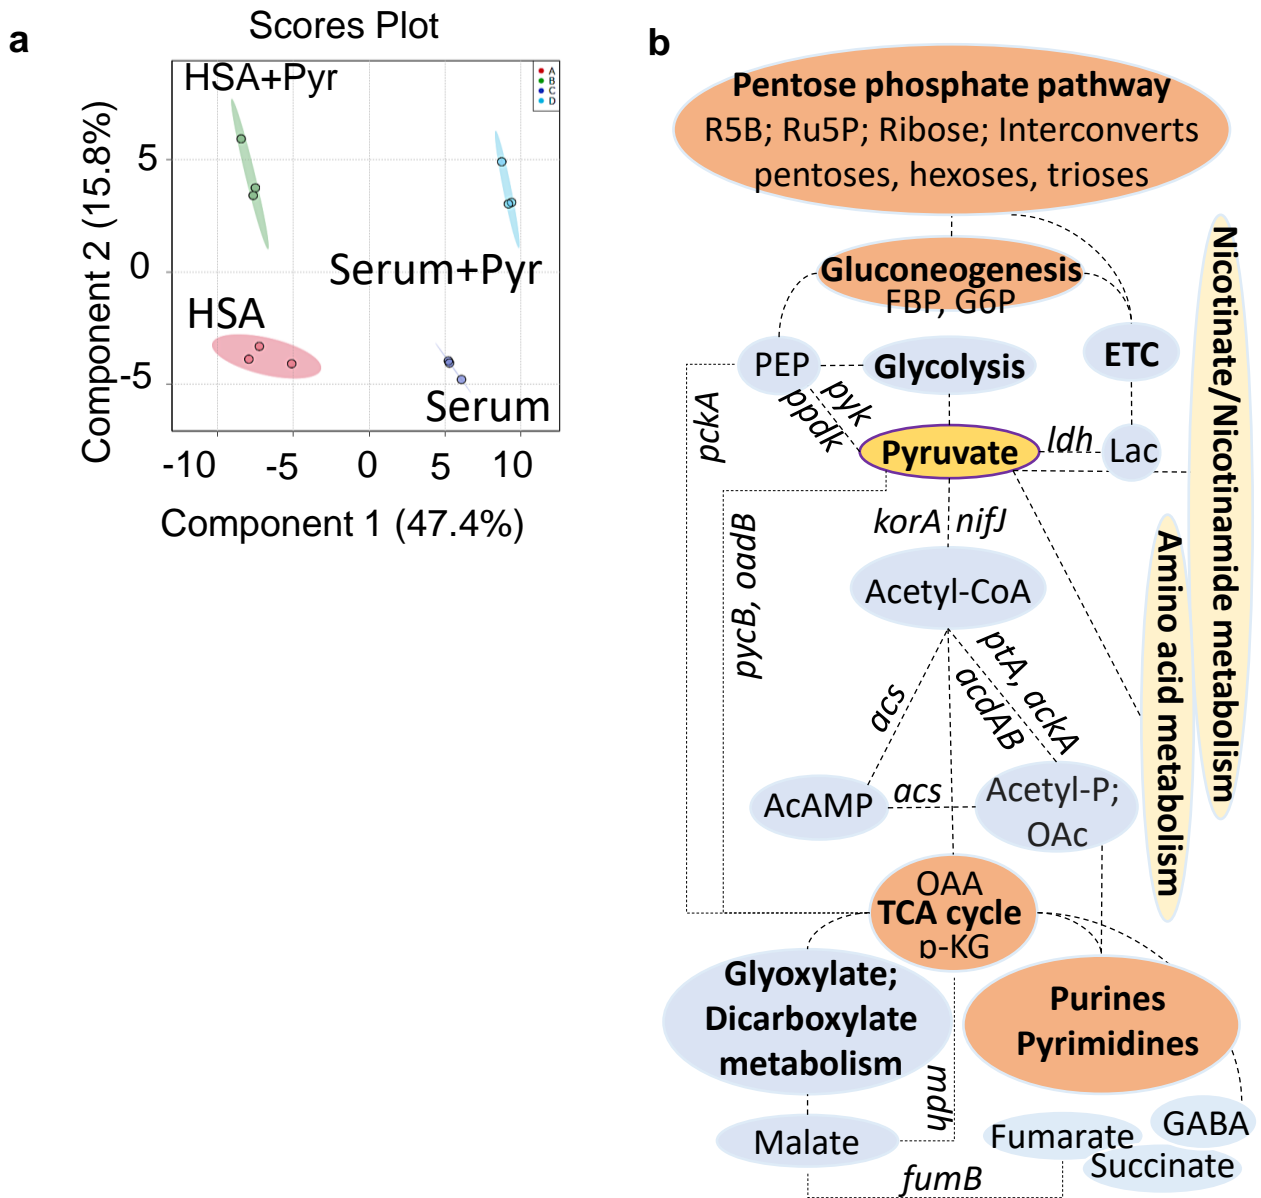

**Supplementary Figure 5** (A) Scores plot of principal component analysis (PCA) of a multi-group comparison shows metabolite population distribution among all given growth conditions. (B) Canonical metabolic networks associated with pyruvate metabolism in *P. gingivalis* that were predicted and visualized using MetScape visualization tool. Italic letters represent genes that are predicted in *P. gingivalis*.

**Supplementary Figure 6 (A)** Identified metabolites with  $p$ -value  $< 0.05$  are mapped onto the interaction network. The size of the circles correspond to the node degree (the number of links a node has to other nodes) and betweenness centrality (the degree of centrality a node has in a network) and metabolites with high values of these parameters play as metabolic hubs in the cells. (B) Box-plots showing distribution of average total metabolites ( $t$  test,  $p$ -value  $< 0.05$ ) in the metabolome of biofilm cells upon concomitant utilization of HSA and pyruvate when compared with HSA or human serum-only medium.

**a**

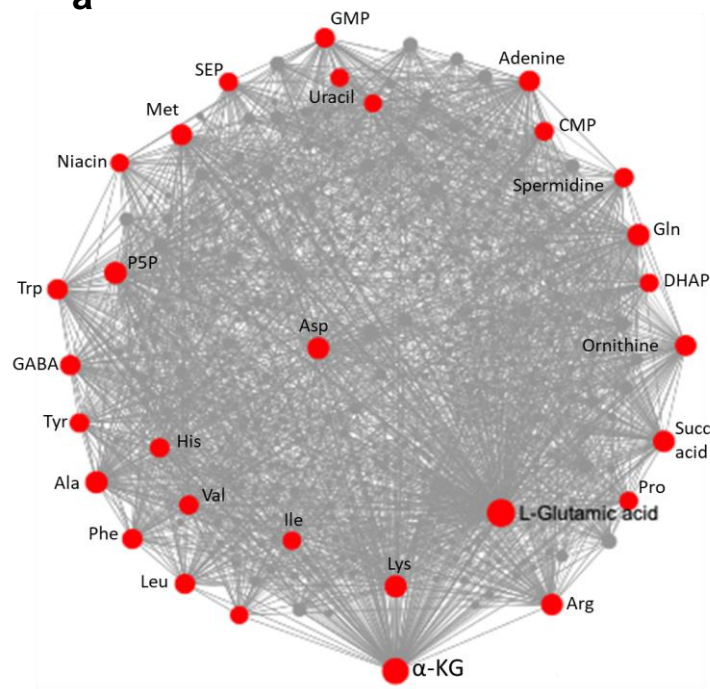

**b**

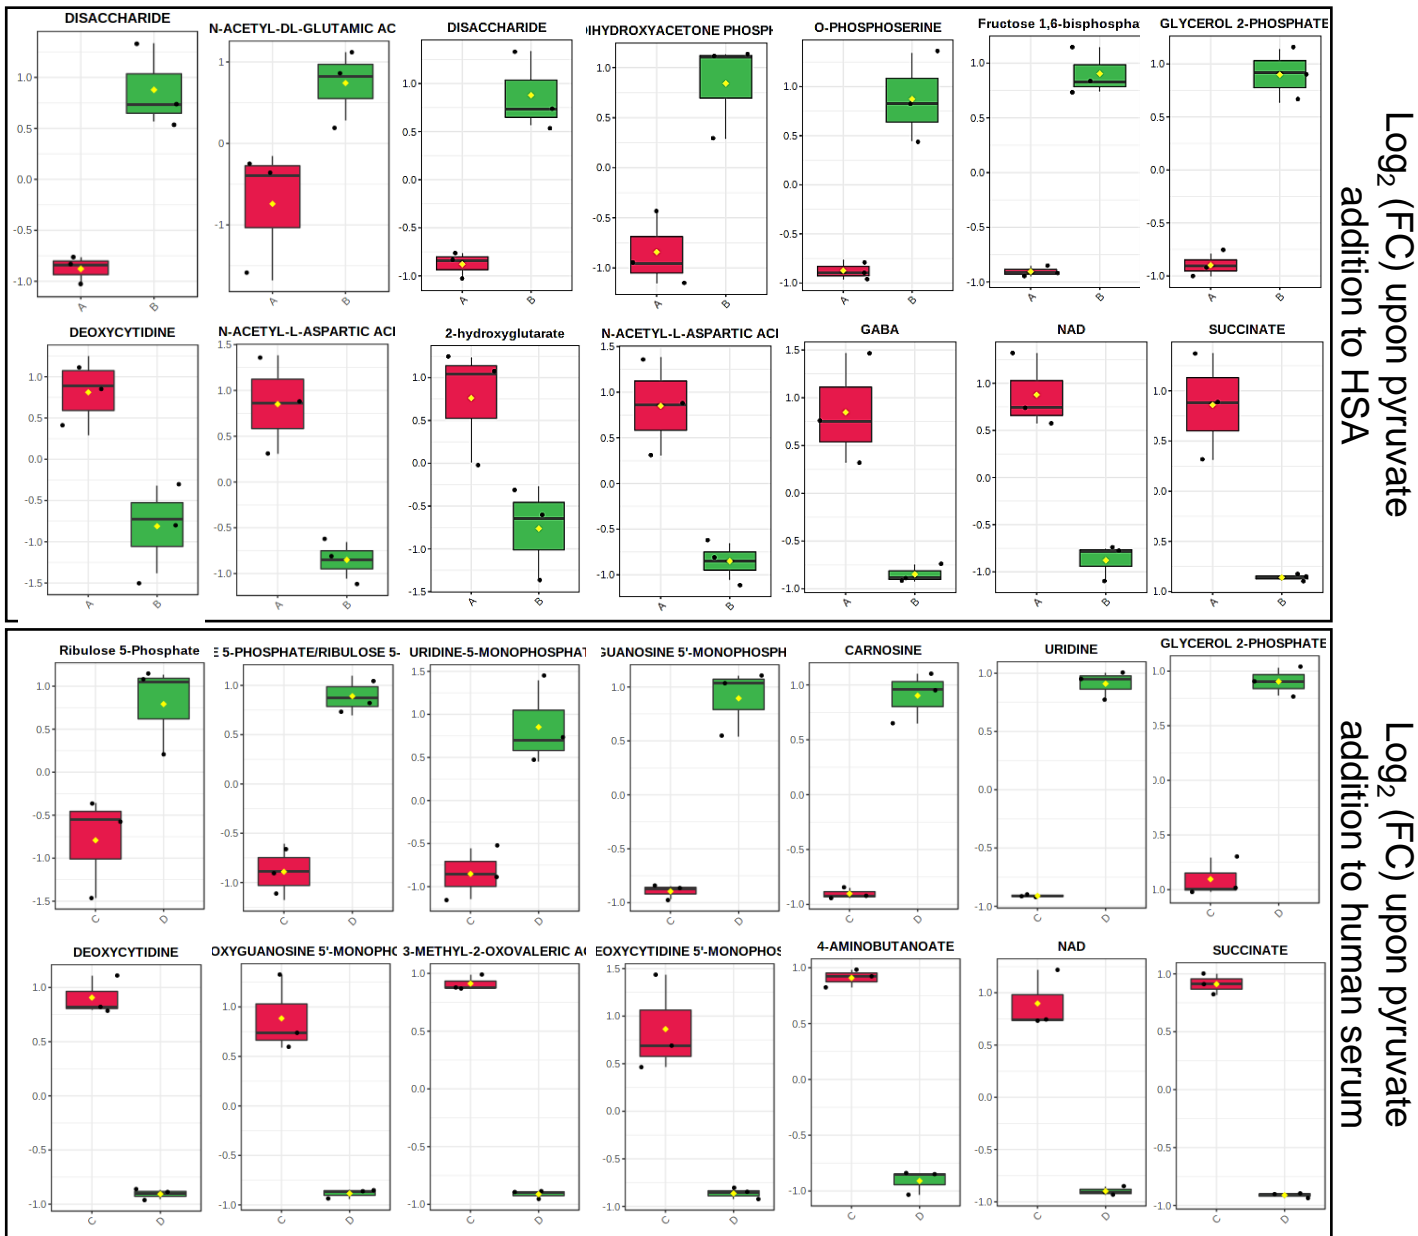

Log<sub>2</sub> (FC) upon pyruvate addition to HSA

Log<sub>2</sub> (FC) upon pyruvate addition to human serum

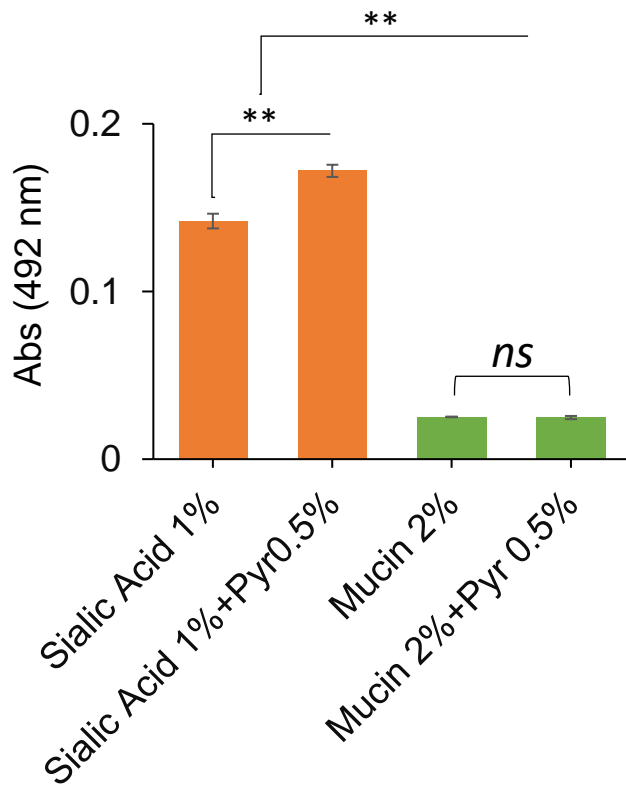

**Supplementary Figure 7** Biofilm assay shows *P. gingivalis* can utilize free n-acetylneuraminate as sole nitrogen/carbon source, but not mucin-associated n-acetylneuraminate, to form biofilm that is augmented when pyruvate is added. Graph represents mean biomass of biofilms  $\pm$  SE (n=5) at 48 h, as determined by safranin staining. Biofilm biomasses were normally distributed (Shapiro-Wilk test:  $P > 0.05$ ), and thus analyzed using ANOVA test. Asterisks indicate pairs of significantly different values (*post hoc* Tukey's HSD test: \*\*,  $p < 0.01$ ; ns, not significant).

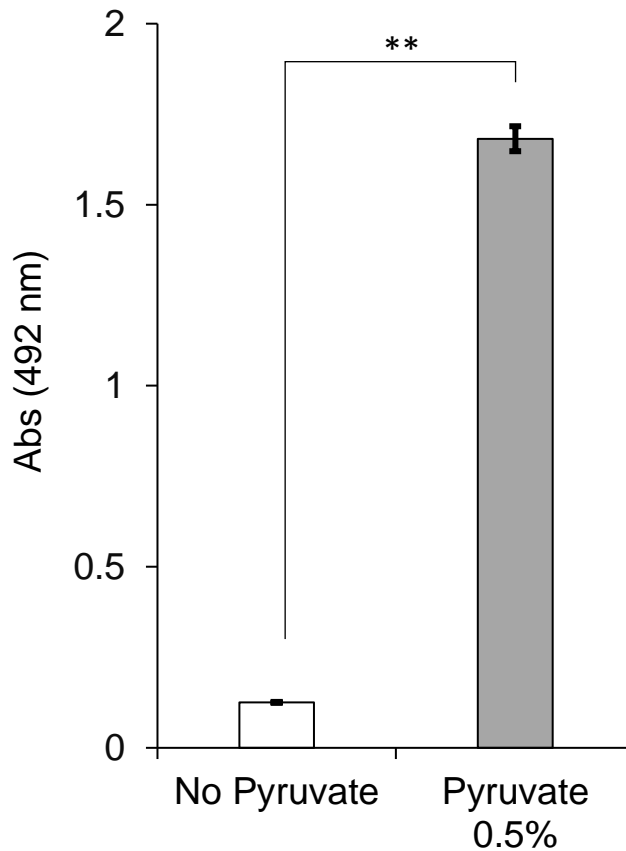

**Supplementary Figure 8** Biofilm assay shows that *P. gingivalis* forms biofilm in RPMI 1640 medium supplemented with 5% human serum; biofilm was augmented upon pyruvate addition. Graph represents mean biomass of biofilms  $\pm$  SE (n=5) at 48 h, as determined by safranin staining. Biofilm biomasses were normally distributed (Shapiro-Wilk test:  $P > 0.05$ ), and thus analyzed using ANOVA test. Asterisks indicate pairs of significantly different values (*post hoc* Tukey's HSD test: \*\*,  $p < 0.01$ ).



**Supplementary Figure 9** Box plots of all experiments displaying the data distribution through their quartiles.

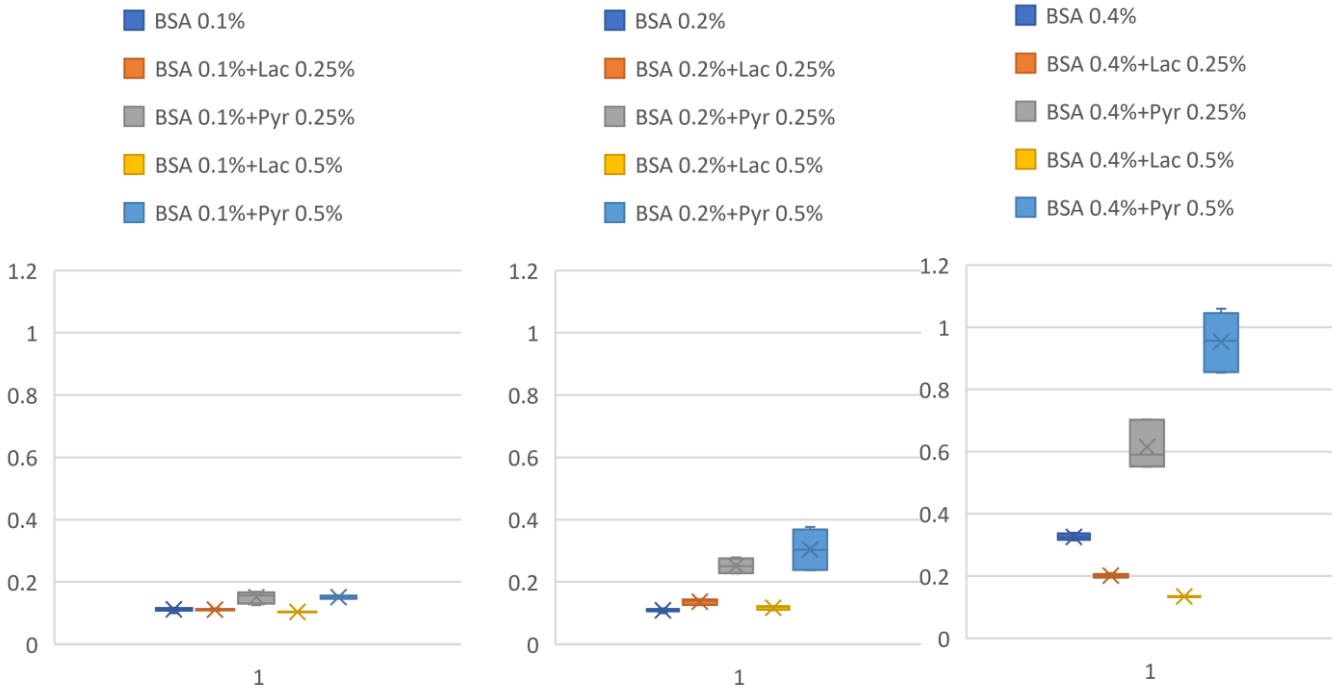

Box plot of Fig. 1A displaying the data distribution through their quartiles

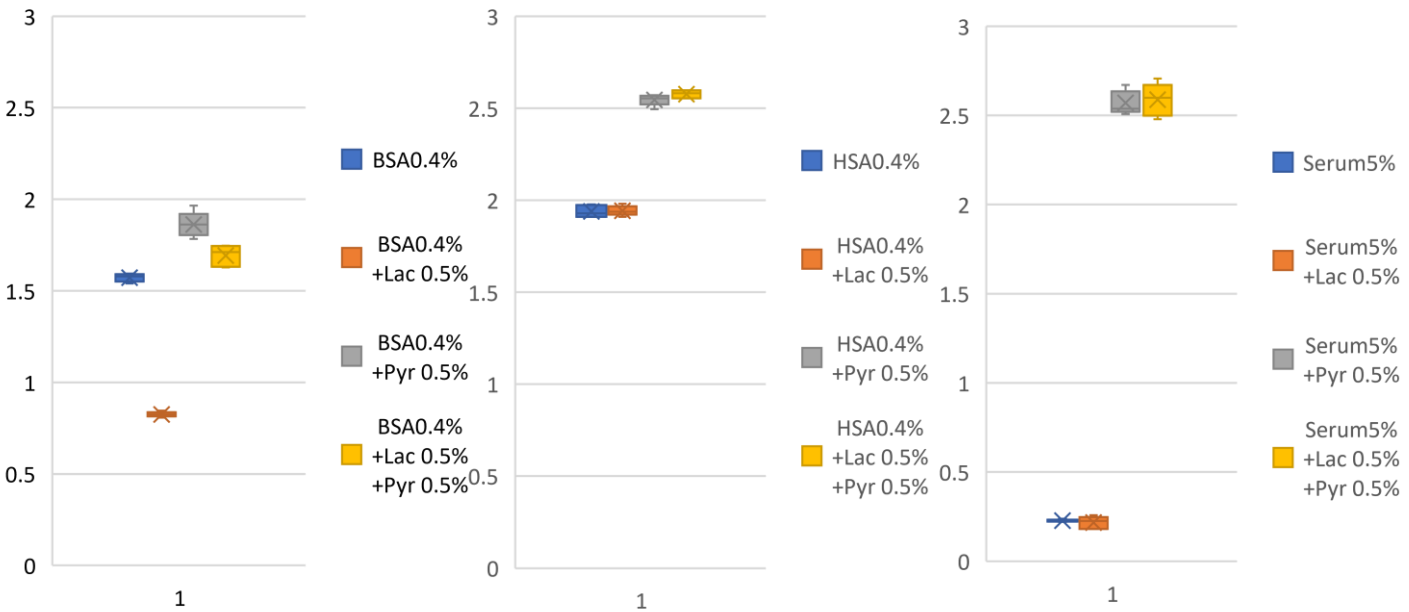

Box plot of Fig. 1B displaying the data distribution through their quartiles

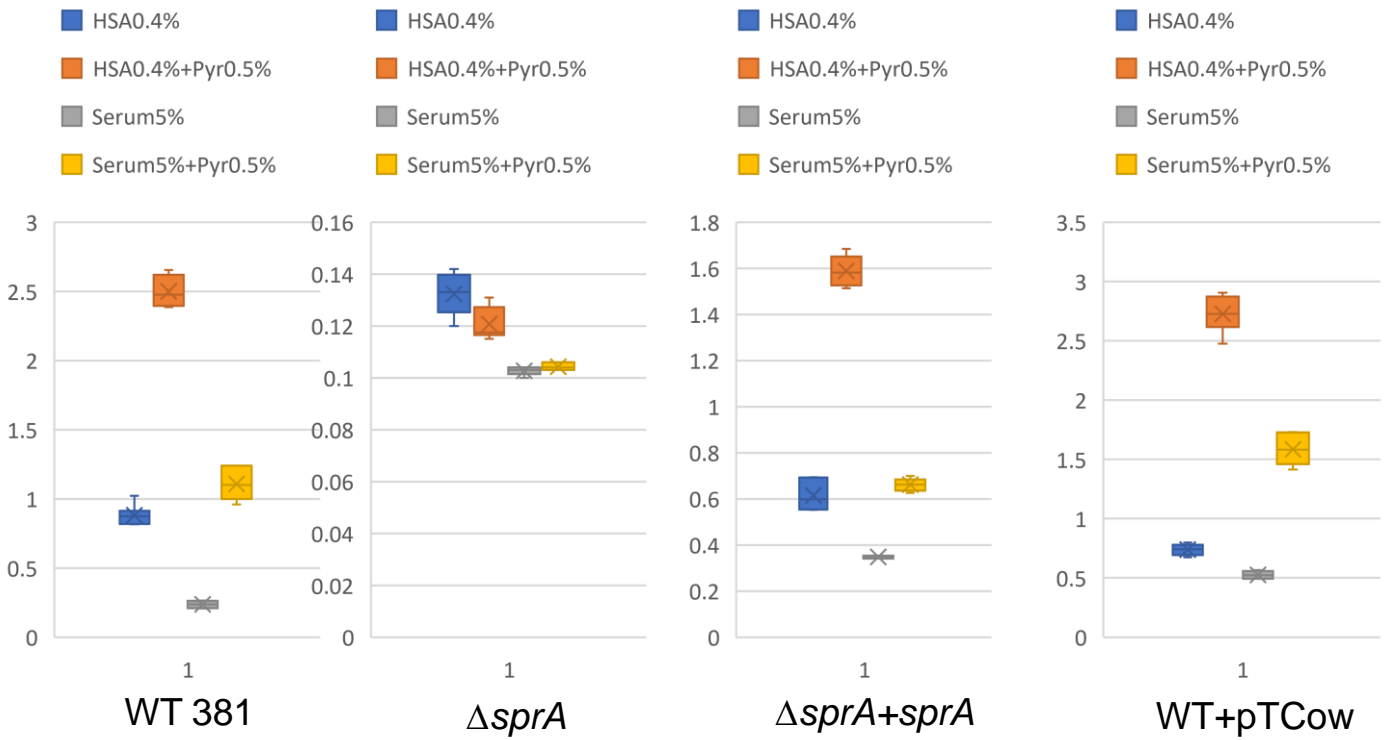

Box plot of Fig. 2A displaying the data distribution through their quartiles

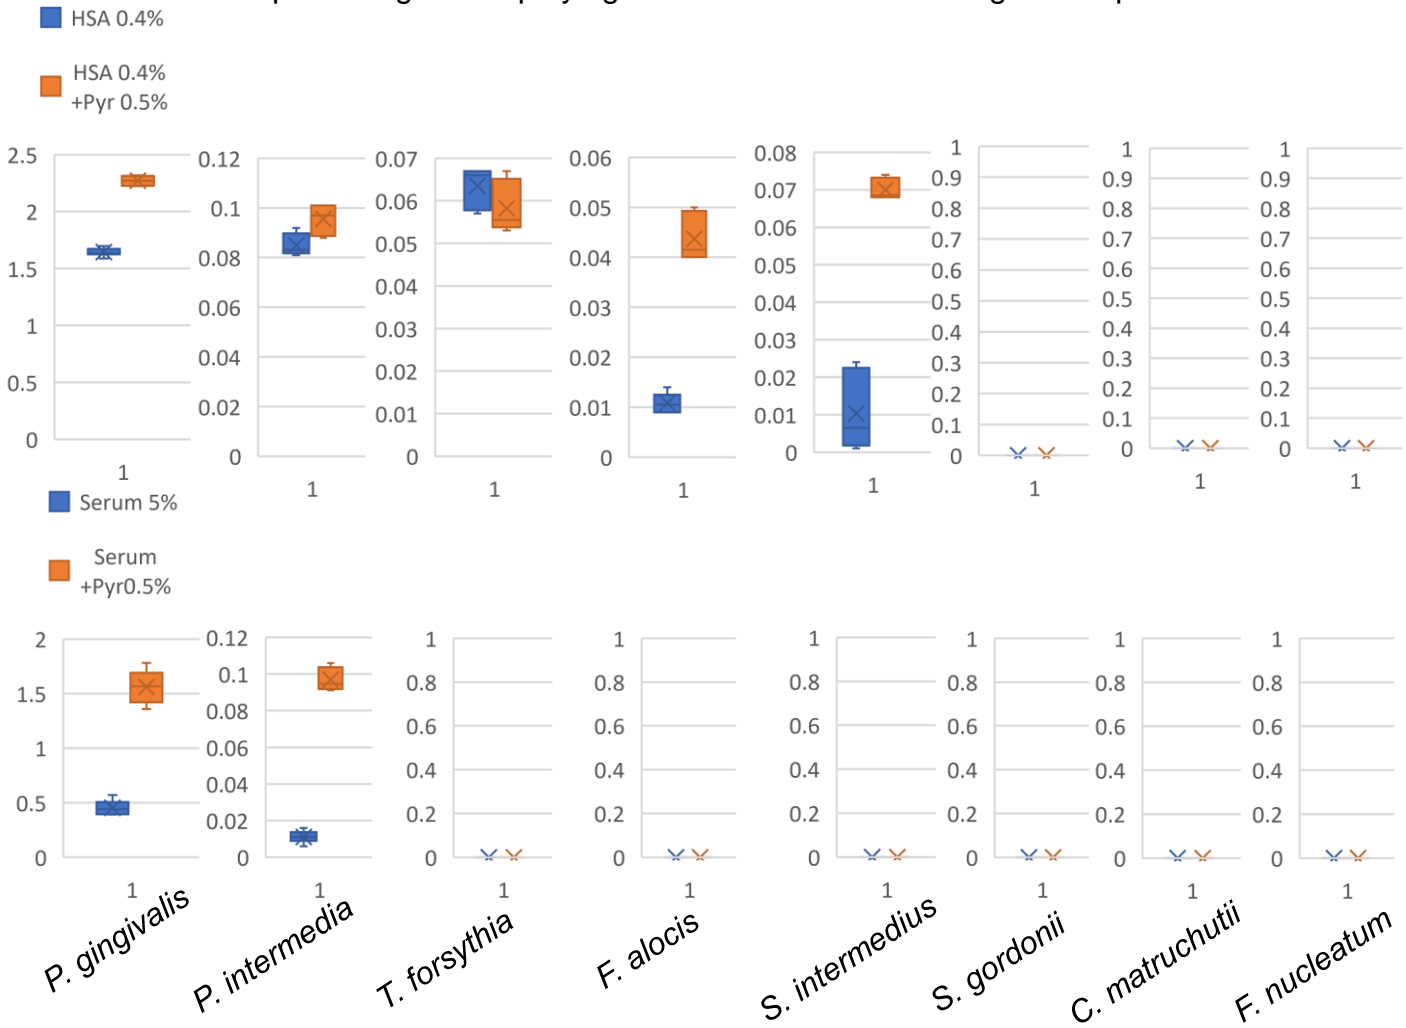

Box plot of Fig. 2B displaying the data distribution through their quartiles

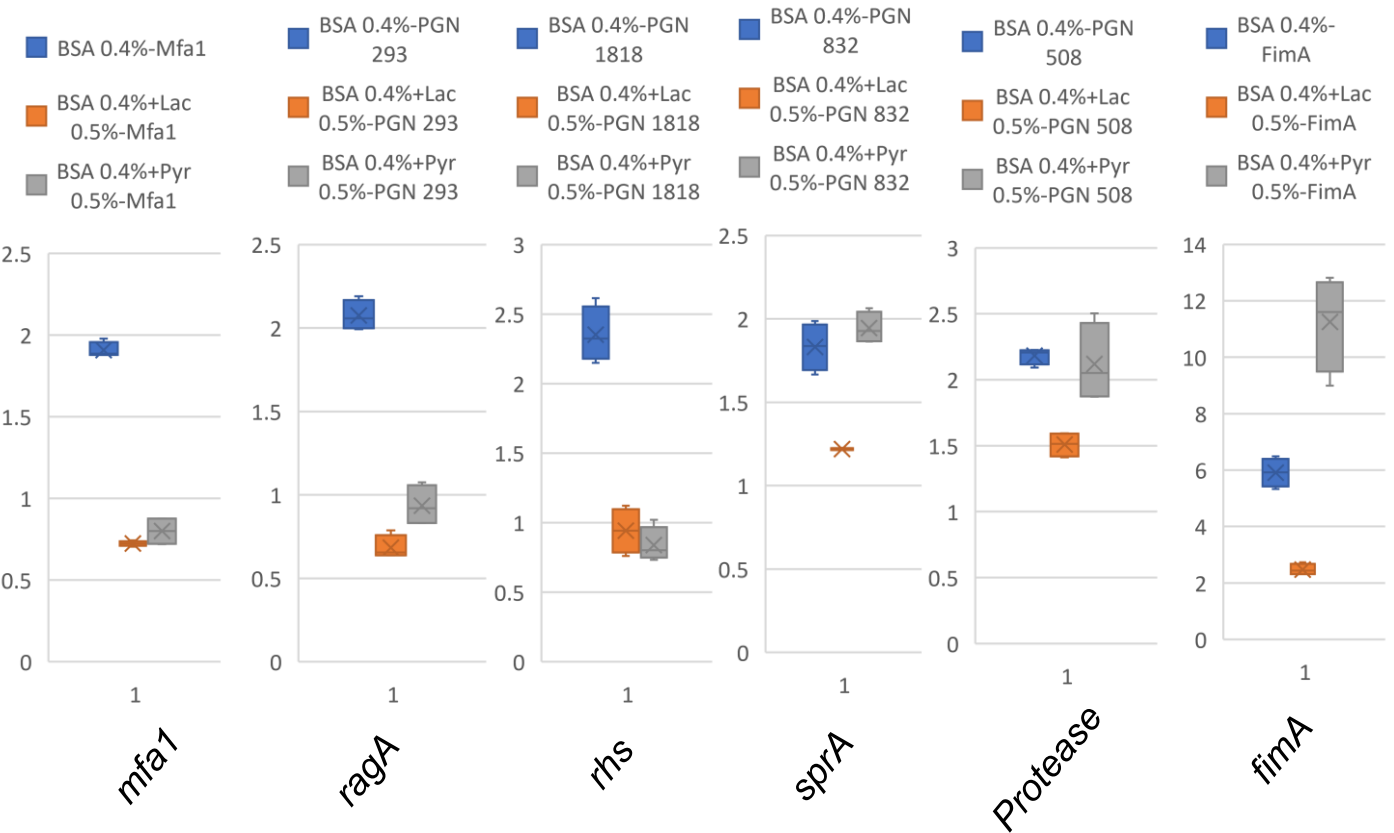

Box plot of Fig. 3A displaying the data distribution through their quartiles

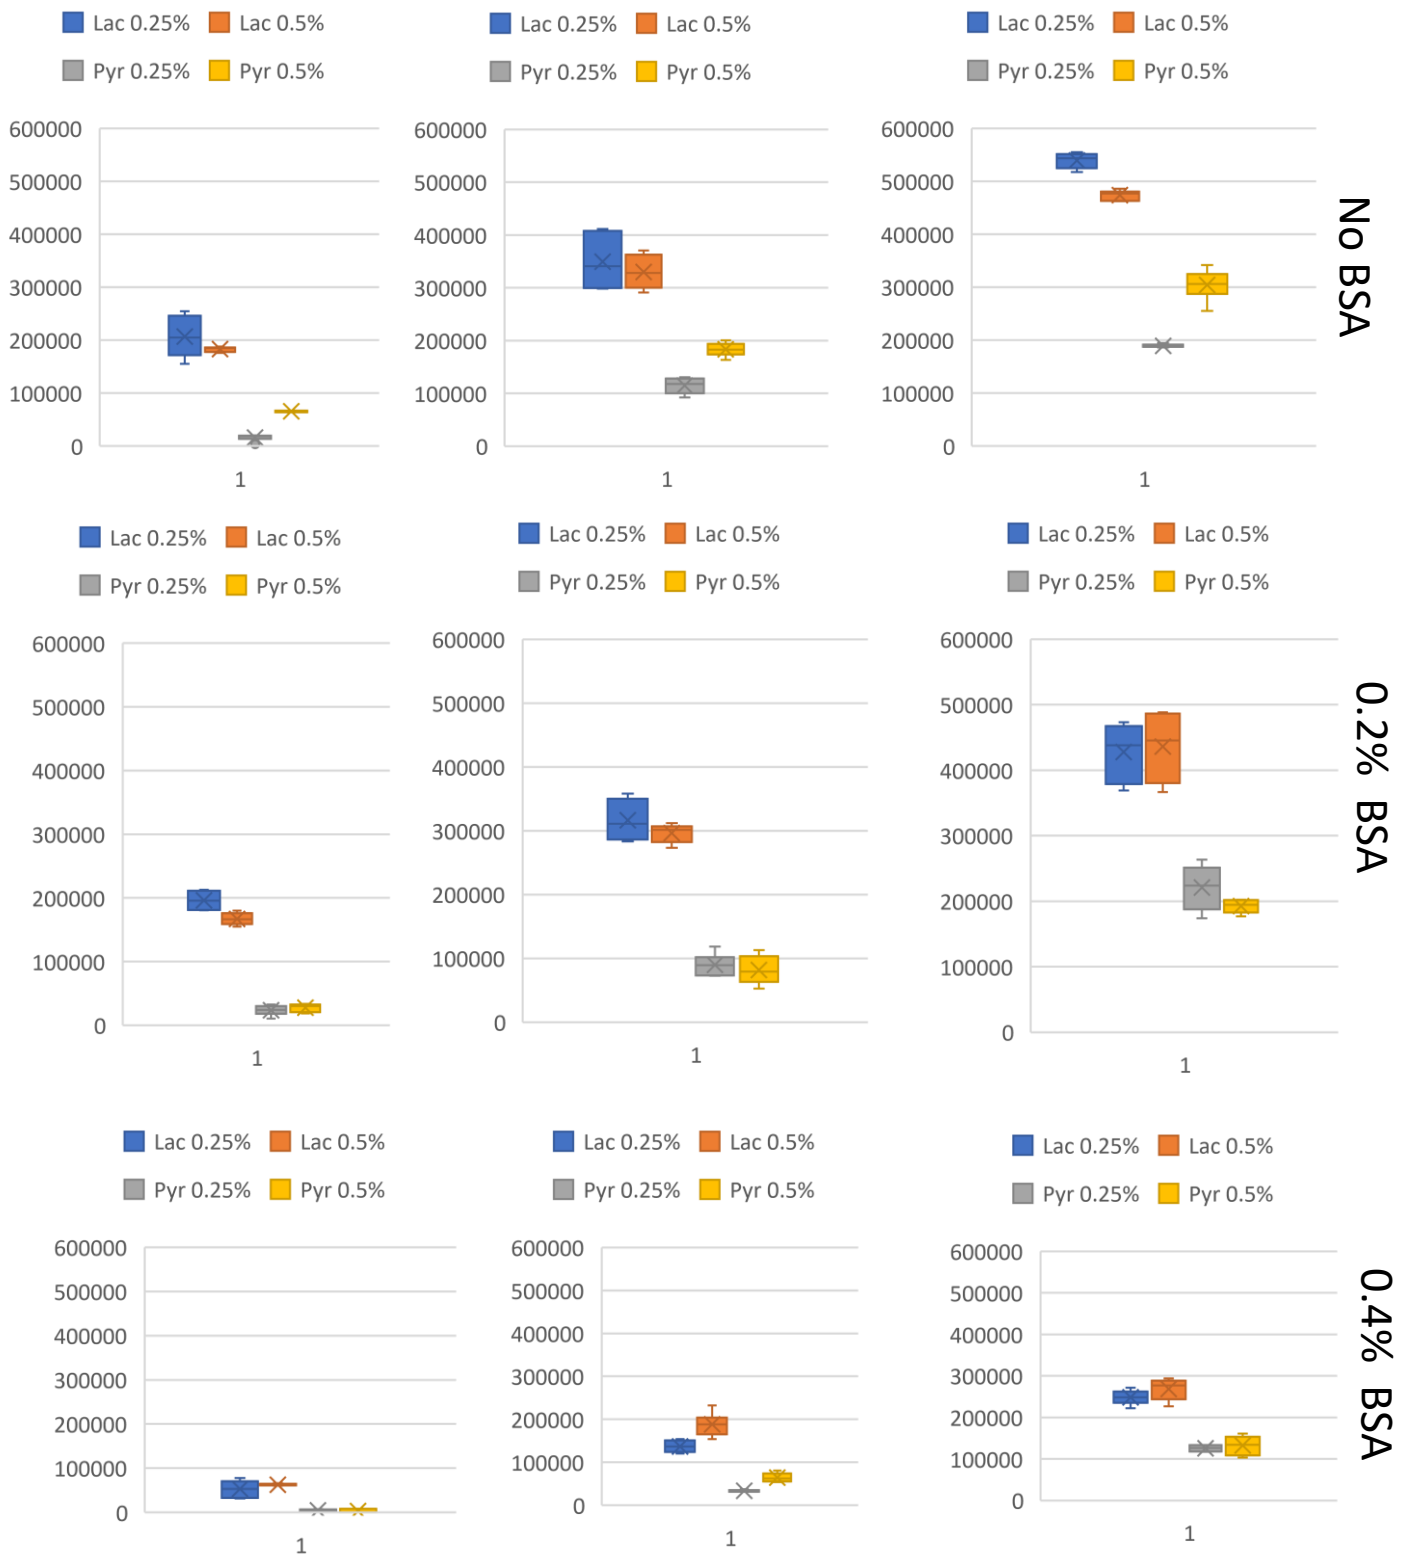

Box plot of Fig. 4A displaying the data distribution through their quartiles

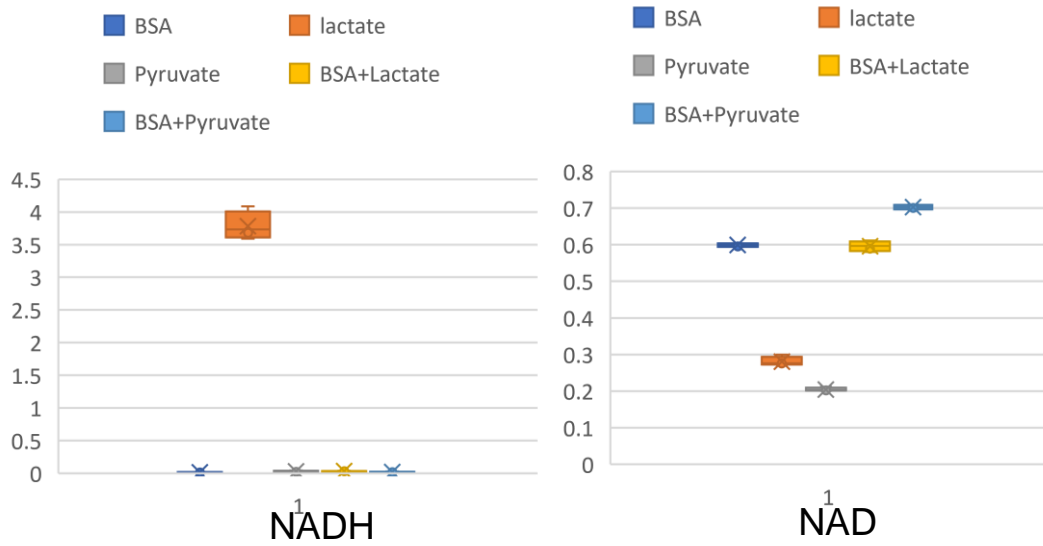

Box plot of Fig. 4B displaying the data distribution through their quartiles

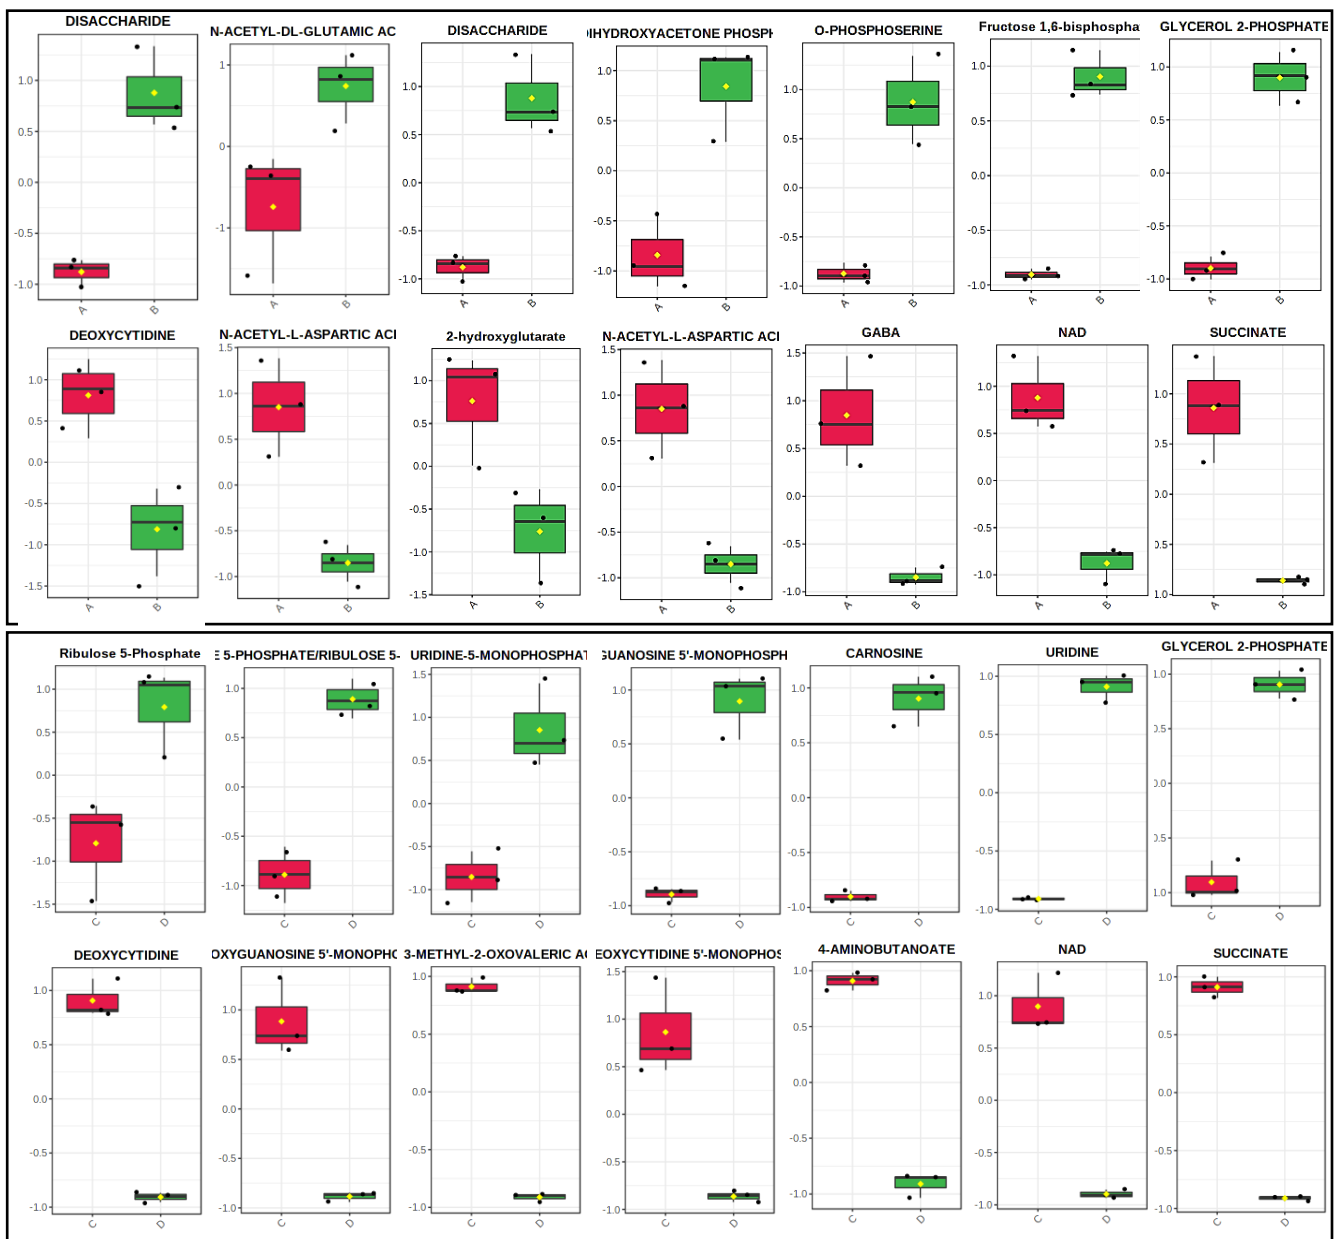

Box plot of Fig. 5 displaying the data distribution through their quartiles

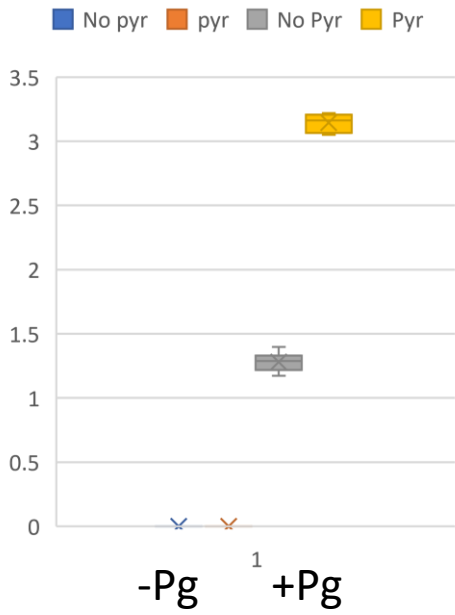

Box plot of Fig. 6A displaying the data distribution through their quartiles

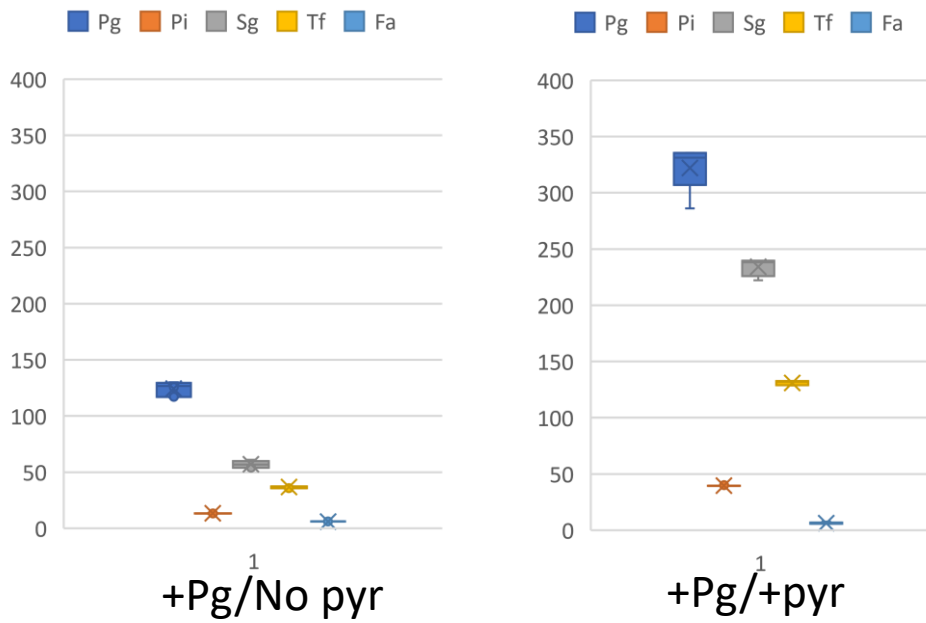

Box plot of Fig. 6B displaying the data distribution through their quartiles

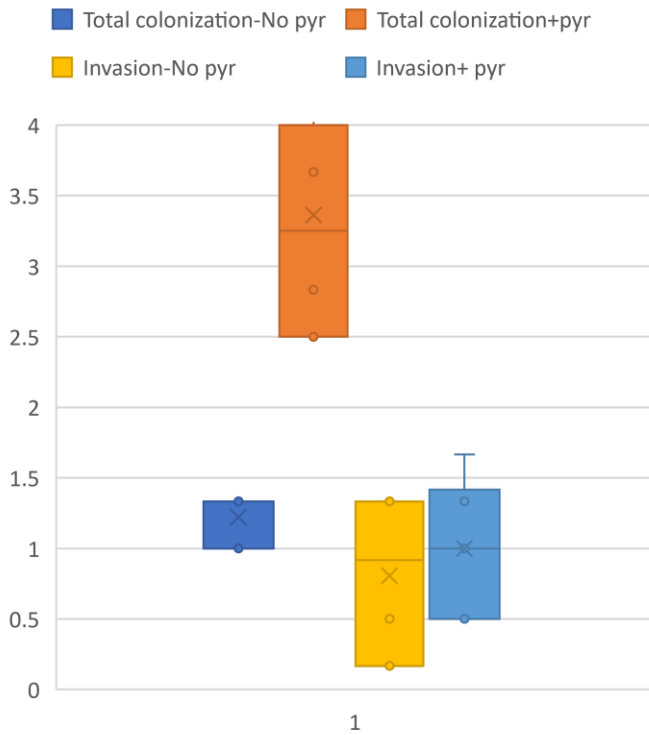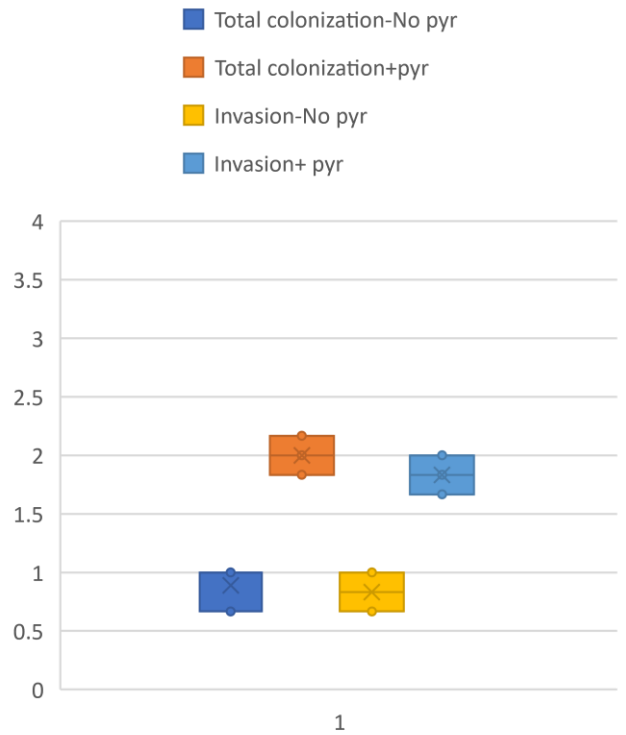

Anaerobic incubation

Aerobic incubation

Box plot of Fig. 6C and D displaying the data distribution through their quartiles

**Supplementary Table 1-** Identified metabolites in the metabolome of *P. gingivalis* cells grown in HSA or human serum, with and without adding pyruvate that show *p*-value < 0.05 in one-way ANOVA and *post hoc* analysis for multi-group analysis

| Name                                 | <i>p</i> -value |
|--------------------------------------|-----------------|
| CARNOSINE                            | 4.96E-12        |
| URIDINE                              | 2.67E-10        |
| SUCCINATE                            | 1.17E-09        |
| UROCANATE                            | 1.65E-09        |
| ADENOSINE 3',5'-CYCLIC MONOPHOSPHATE | 3.80E-09        |
| N-ACETYLNEURAMINATE                  | 3.84E-09        |
| LL-2,6-DIAMINOHEPTANEDIOATE          | 6.22E-09        |
| 5'-DEOXYADENOSINE                    | 1.58E-08        |
| GLYCEROL 2-PHOSPHATE                 | 2.46E-08        |
| FRUCTOSE 1,6-BISPHOSPHATE            | 6.42E-08        |
| GLYCERIC ACID                        | 1.03E-07        |
| L-ARGININE                           | 1.43E-07        |
| GLYCEROPHOSPHOCHOLINE                | 2.45E-07        |
| 4-AMINOBTANOATE                      | 2.48E-07        |
| 4-HYDROXYPHENYLACETATE               | 2.54E-07        |
| O-PHOSPHOSERINE                      | 2.57E-07        |
| C12H22O11-DISACCHARIDE               | 2.90E-07        |
| NAD                                  | 3.61E-07        |
| L-CYSTEINE-S-SULFATE                 | 7.87E-07        |
| S-HEXYL-GLUTATHIONE                  | 1.03E-06        |
| TRYPTOPHAN                           | 1.75E-06        |
| DIHYDROXYACETONE PHOSPHATE           | 1.84E-06        |
| ASPARAGINE                           | 2.03E-06        |
| L-HISTIDINE                          | 2.13E-06        |
| GUANOSINE 5'-MONOPHOSPHATE           | 2.36E-06        |
| 5-HYDROXYMETHYL-2-FURALDEHYDE        | 2.38E-06        |
| 4-OXOPROLINE                         | 2.45E-06        |
| AGMATINE SULFATE                     | 3.58E-06        |
| L-ISOLEUCINE                         | 3.65E-06        |
| ALPHA-KETOGLUTARIC ACID              | 3.73E-06        |
| CITRULLINE                           | 7.28E-06        |
| N-ALPHA-ACETYL-L-LYSINE              | 7.52E-06        |
| L-TYROSINE                           | 8.84E-06        |
| C6H12O6-HEXOSE/KETOSE/INOSITOL       | 9.01E-06        |
| 3-HYDROXYPHENYLACETATE               | 9.66E-06        |
| L-GLUTAMIC ACID                      | 9.86E-06        |
| GLUCOSE/FRUCTOSE                     | 1.08E-05        |
| FUMARIC ACID                         | 1.10E-05        |
| CMP                                  | 1.40E-05        |
| HEXOSE-6-PHOSPHATE                   | 2.15E-05        |
| PANTETHEINE                          | 2.63E-05        |
| N-METHYL-L-GLUTAMATE                 | 3.10E-05        |
| N-ACETYL-D-MANNOSAMINE               | 4.19E-05        |
| 4-HYDROXY-L-PHENYLGLYCINE            | 4.66E-05        |
| N-ACETYL-L-ASPARTIC ACID             | 5.32E-05        |



|                                                               |          |
|---------------------------------------------------------------|----------|
| N-AMIDINO-L-ASPARTATE                                         | 7.78E-05 |
| 5-OXO-L-PROLINE                                               | 8.11E-05 |
| D-GLUCURONIC ACID/D-GLUCURONOLACTONE/D--<br>GALACTURONIC ACID | 8.61E-05 |
| ASPARTATE                                                     | 9.35E-05 |
| N-ACETYL-HEXOSAMINE                                           | 0.000163 |
| 2-HYDROXYPHENYLALANINE                                        | 0.000165 |
| NICOTINAMIDE MONONUCLEOTIDE                                   | 0.000165 |
| DAMP                                                          | 0.000173 |
| SPERMIDINE                                                    | 0.000175 |
| L-VALINE                                                      | 0.000178 |
| TRYPTOPHAN-NH3                                                | 0.000191 |
| HEXOSE-DISACCHARIDE                                           | 0.000209 |
| D-RIBOSE 5-PHOSPHATE/RIBULOSE 5-PHOSPHATE                     | 0.000246 |
| DEOXYCYTIDINE                                                 | 0.000248 |
| C5-SUGAR ALCOHOL                                              | 0.000286 |
| XANTHINE                                                      | 0.000289 |
| L-LYSINE                                                      | 0.00033  |
| URACIL                                                        | 0.000341 |
| L-ALLOTHREONINE                                               | 0.000375 |
| PYRIDOXAL                                                     | 0.000427 |
| SARCOSINE/BETA-ALANINE                                        | 0.000468 |
| L-CYSTINE                                                     | 0.000498 |
| N-BOC-L-TRYPTOPHAN                                            | 0.000525 |
| NICOTINATE                                                    | 0.000535 |
| D-GLUCOSAMINE 6-PHOSPHATE                                     | 0.000537 |
| ALPHA-AMINOADIPATE                                            | 0.000729 |
| ISOCITRIC ACID                                                | 0.000819 |
| METHIONINE SULFOXIDE                                          | 0.00088  |
| THYMINE                                                       | 0.000895 |
| L-PROLINE                                                     | 0.001076 |
| BOC-D-PHENYLALANINE                                           | 0.001095 |
| TRYPTOPHAN-2,3,3-D3                                           | 0.001175 |
| L-ASPARAGINE                                                  | 0.001489 |
| SALICYLIC ACID-D4                                             | 0.001606 |
| ORNITHINE                                                     | 0.001722 |
| GLUCOSAMINE/MANNOSAMINE                                       | 0.001812 |
| L-ISOLEUCINE                                                  | 0.00182  |
| GLUCONIC ACID/D-GULONIC ACID GAMA-LACTONE                     | 0.002042 |
| 5-HYDROXY-N-FORMYLKYNURENINE                                  | 0.003124 |
| 5-HYDROXY-L-TRYPTOPHAN                                        | 0.003461 |
| GLUTARATE                                                     | 0.003548 |
| L-LEUCINE                                                     | 0.003618 |
| D-RIBOSE                                                      | 0.00369  |
| ALANINE                                                       | 0.005109 |
| NPAI-METHYL-L-HISTIDINE                                       | 0.007404 |
| PHENYLALANINE                                                 | 0.007782 |
| N-FORMYL-L-METHIONINE                                         | 0.009608 |
| GLYCYL-L-LEUCINE                                              | 0.009623 |

|                                    |          |
|------------------------------------|----------|
| L-METHIONINE                       | 0.011336 |
| N-BOC-L-ASPARTIC ACID              | 0.015979 |
| TRYPTOPHAN-2,3,3-D3-NH3            | 0.01787  |
| ALDOPENTOSE                        | 0.020202 |
| 3-SULFINO-L-ALANINE                | 0.020318 |
| PYRIDOXAL 5'-PHOSPHATE             | 0.021224 |
| FORMYLKYNURENINE                   | 0.02263  |
| ADENINE                            | 0.025283 |
| L-GLUTAMINE                        | 0.029284 |
| 2'-DEOXYGUANOSINE 5'-MONOPHOSPHATE | 0.031095 |

**Supplementary Table 2-** Identified metabolites in the metabolome of *P. gingivalis* cells grown in HSA or human serum with and without adding pyruvate that show Variable Importance in Projection (VIP) greater than 1.0 upon a multi-group analysis and PLS-DA model

| Name                                         | PLSDA_VIP |         |         |
|----------------------------------------------|-----------|---------|---------|
|                                              | Comp. 1   | Comp. 2 | Comp. 3 |
| NAD                                          | 1.5003    | 1.4733  | 1.4678  |
| 5-HYDROXY-L-TRYPTOPHAN                       | 1.4992    | 1.4724  | 1.4658  |
| L-GLUTAMIC ACID                              | 1.4967    | 1.4692  | 1.4603  |
| SPERMIDINE                                   | 1.4935    | 1.4637  | 1.4528  |
| D-GLUCOSAMINE 6-PHOSPHATE                    | 1.4757    | 1.4297  | 1.4182  |
| GUANOSINE 5'-MONOPHOSPHATE                   | 1.4627    | 1.4139  | 1.4065  |
| AGMATINE SULFATE                             | 1.4573    | 1.4084  | 1.3972  |
| N-METHYL-L-GLUTAMATE                         | 1.4555    | 1.406   | 1.3948  |
| CMP                                          | 1.4523    | 1.403   | 1.394   |
| N-ACETYLNEURAMINATE                          | 1.4471    | 1.3992  | 1.388   |
| L-HISTIDINE                                  | 1.4437    | 1.3956  | 1.3849  |
| ALPHA-KETOGLUTARIC ACID                      | 1.4392    | 1.3906  | 1.3816  |
| DAMP                                         | 1.4372    | 1.3883  | 1.3783  |
| 5-OXO-L-PROLINE                              | 1.4321    | 1.3836  | 1.3734  |
| N-AMIDINO-L-ASPARTATE                        | 1.4321    | 1.3848  | 1.3738  |
| 4-OXOPROLINE                                 | 1.4297    | 1.3817  | 1.3708  |
| XANTHINE                                     | 1.4038    | 1.3985  | 1.3881  |
| ETHYLMALONIC ACID                            | 1.3989    | 1.3608  | 1.352   |
| L-ASPARAGINE                                 | 1.3963    | 1.3491  | 1.3411  |
| CITRULLINE                                   | 1.3952    | 1.3593  | 1.3571  |
| ALPHA-AMINOADIPATE                           | 1.3939    | 1.3466  | 1.3358  |
| N-ALPHA-ACETYL-L-LYSINE                      | 1.3815    | 1.3404  | 1.3299  |
| NICOTINAMIDE MONONUCLEOTIDE                  | 1.3766    | 1.3318  | 1.3215  |
| FUMARIC ACID                                 | 1.3658    | 1.3256  | 1.315   |
| N-FORMYL-L-METHIONINE                        | 1.3658    | 1.3576  | 1.3475  |
| GLUCONIC ACID/D-GULONIC ACID<br>GAMA-LACTONE | 1.3638    | 1.3176  | 1.3084  |
| GLUTARATE                                    | 1.3617    | 1.3169  | 1.3072  |
| L-VALINE                                     | 1.3594    | 1.3195  | 1.3118  |
| L-LYSINE                                     | 1.3588    | 1.3132  | 1.3031  |
| ISOCITRIC ACID                               | 1.3568    | 1.3137  | 1.307   |
| L-PROLINE                                    | 1.3433    | 1.2982  | 1.2932  |
| LL-2,6-DIAMINOHEPTANEDIOATE                  | 1.3427    | 1.3023  | 1.2984  |
| 3-HYDROXYPHENYLACETATE                       | 1.321     | 1.2815  | 1.2718  |
| S-HEXYL-GLUTATHIONE                          | 1.3087    | 1.2697  | 1.2613  |
| ASPARAGINE                                   | 1.3062    | 1.2744  | 1.2642  |
| GLYCEROPHOSPHOCHOLINE                        | 1.2991    | 1.2625  | 1.2543  |
| ALANINE                                      | 1.2983    | 1.2707  | 1.2609  |
| TRYPTOPHAN                                   | 1.2974    | 1.2628  | 1.2537  |
| L-TYROSINE                                   | 1.2849    | 1.2474  | 1.2379  |

|                                                           |        |        |        |
|-----------------------------------------------------------|--------|--------|--------|
| PANTETHEINE                                               | 1.2817 | 1.2408 | 1.2437 |
| D-GLUCURONIC ACID/D-GLUCURONOLACTONE/D--GALACTURONIC ACID | 1.2613 | 1.2328 | 1.2292 |
| CARNOSINE                                                 | 1.2585 | 1.2266 | 1.2257 |
| 2'-DEOXYGUANOSINE 5'-MONOPHOSPHATE                        | 1.252  | 1.21   | 1.2005 |
| L-ISOLEUCINE                                              | 1.2377 | 1.2246 | 1.2181 |
| URIDINE                                                   | 1.2295 | 1.1961 | 1.1973 |
| TRYPTOPHAN-NH3                                            | 1.1941 | 1.167  | 1.1593 |
| C5-SUGAR ALCOHOL                                          | 1.191  | 1.1516 | 1.1543 |
| PYRIDOXAL 5'-PHOSPHATE                                    | 1.1892 | 1.1516 | 1.1423 |
| DIHYDROXYACETONE PHOSPHATE                                | 1.1827 | 1.1753 | 1.1691 |
| 2-HYDROXYPHENYLALANINE                                    | 1.1774 | 1.1518 | 1.1438 |
| MALATE                                                    | 1.1569 | 1.1186 | 1.1104 |
| 5-HYDROXY-N-FORMYLKYNURENINE                              | 1.15   | 1.1158 | 1.113  |
| D-RIBOSE                                                  | 1.1395 | 1.1127 | 1.1146 |
| CYTIDINE                                                  | 1.1328 | 1.0953 | 1.0867 |
| 2'-DEOXYCYTIDINE 5'-MONOPHOSPHATE                         | 1.1256 | 1.0965 | 1.0893 |
| N-ACETYL-L-ASPARTIC ACID                                  | 1.1252 | 1.2294 | 1.228  |
| L-CYSTEINE-S-SULFATE                                      | 1.1239 | 1.1279 | 1.1233 |
| L-ARGININE                                                | 1.0907 | 1.1075 | 1.1004 |
| 4-HYDROXYPHENYLACETATE                                    | 1.0876 | 1.0706 | 1.0674 |
| FORMYLKYNURENINE                                          | 1.0864 | 1.0579 | 1.0699 |
| ADENINE                                                   | 1.0807 | 1.044  | 1.0492 |
| L-CYSTINE                                                 | 1.0777 | 1.0411 | 1.0457 |
| MGDG 20_70                                                | 1.0757 | 1.042  | 1.0496 |
| DEOXYCYTIDINE                                             | 1.075  | 1.154  | 1.1449 |
| ADENOSINE 5'-MONOPHOSPHATE                                | 1.0655 | 1.0342 | 1.0259 |
| 4-HYDROXY-L-PHENYLGLYCINE                                 | 1.0652 | 1.0852 | 1.077  |
| ISOCYTOSINE                                               | 1.0564 | 1.0212 | 1.0135 |
| ALDOPENTOSE                                               | 1.0535 | 1.0243 | 1.0278 |
| NPAI-METHYL-L-HISTIDINE                                   | 1.0447 | 1.0108 | 1.0191 |
| URIDINE-5-MONOPHOSPHATE                                   | 1.0398 | 1.0203 | 1.0127 |
| PYRIDOXAL                                                 | 1.0327 | 1.0717 | 1.0665 |
| C6H12O6-HEXOSE/KETOSE/INOSITOL                            | 1.024  | 1.0329 | 1.0259 |
| L-ALLOTHREONINE                                           | 0.9921 | 1.119  | 1.1107 |

**Supplementary Table 3-** Fold change of significant metabolites (*t* test, *p*-value < 0.05) in the biofilm cells upon concomitant utilization of pyruvate and HSA when compared with the HSA-only medium.

| <b>Name</b>                                                                                                                                                                                                   | <b>FC</b> | <b>log2(FC)</b> | <b>raw.pval</b> |
|---------------------------------------------------------------------------------------------------------------------------------------------------------------------------------------------------------------|-----------|-----------------|-----------------|
| HYPOXANTHINE                                                                                                                                                                                                  | 5.0905    | 2.3478          | 0.002155        |
| FRUCTOSE 1,6-BISPHOSPHATE                                                                                                                                                                                     | 2.6985    | 1.4322          | 0.000132        |
| ADENOSINE 3',5'-CYCLIC MONOPHOSPHATE                                                                                                                                                                          | 4.7032    | 2.2336          | 0.00006201      |
| GLYCEROL 2-PHOSPHATE                                                                                                                                                                                          | 3.5493    | 1.8275          | 0.000351        |
| L-ARGININE                                                                                                                                                                                                    | 1.548     | 0.6304          | 0.001268        |
| 5-HYDROXYMETHYL-2-FURALDEHYDE                                                                                                                                                                                 | 1.6776    | 0.7464          | 0.001344        |
| DISACCHARIDE                                                                                                                                                                                                  | 1.8325    | 0.87381         | 0.002103        |
| NAD                                                                                                                                                                                                           | 0.51537   | -0.95632        | 0.002156        |
| O-PHOSPHOSERINE                                                                                                                                                                                               | 2.6301    | 1.3951          | 0.002742        |
| SUCCINATE                                                                                                                                                                                                     | 0.53556   | -0.90088        | 0.004976        |
| N-ACETYL-L-ASPARTIC ACID                                                                                                                                                                                      | 0.41967   | -1.2527         | 0.006874        |
| GABA                                                                                                                                                                                                          | 0.43206   | -1.2107         | 0.007464        |
| DIHYDROXYACETONE PHOSPHATE                                                                                                                                                                                    | 1.5044    | 0.58915         | 0.008792        |
| 5'-DEOXYADENOSINE                                                                                                                                                                                             | 0.48017   | -1.0584         | 0.008828        |
| SPERMIDINE                                                                                                                                                                                                    | 0.6069    | -0.72048        | 0.014408        |
| DEOXYCYTIDINE                                                                                                                                                                                                 | 0.56216   | -0.83096        | 0.01783         |
| URIDINE                                                                                                                                                                                                       | 0.49116   | -1.0257         | 0.022571        |
| HEXOSE-6-PHOSPHATE                                                                                                                                                                                            | 1.7881    | 0.8384          | 0.024922        |
| HEXOSE-DISACCHARIDE                                                                                                                                                                                           | 1.6245    | 0.69998         | 0.027357        |
| D-RIBOSE 5-PHOSPHATE/RIBULOSE 5-PHOSPHATE                                                                                                                                                                     | 1.5028    | 0.58765         | 0.02825         |
| N-ACETYL-HEXOSAMINE                                                                                                                                                                                           | 1.5946    | 0.67322         | 0.029576        |
| PYRIDOXINE                                                                                                                                                                                                    | 0.63007   | -0.66642        | 0.032448        |
| 2-HYDROXYGLUTARATE                                                                                                                                                                                            | 0.5115    | -0.9672         | 0.038471        |
| N-ACETYL-DL-GLUTAMIC ACID                                                                                                                                                                                     | 1.6681    | 0.7382          | 0.049681        |
| Fold change of significant metabolites ( <i>t</i> test, <i>p</i> -value < 0.05) in the biofilm cells upon concomitant utilization of pyruvate and human serum when compared with the human serum-only medium. |           |                 |                 |
| <b>NAME</b>                                                                                                                                                                                                   | <b>FC</b> | <b>log2(FC)</b> | <b>raw.pval</b> |
| 3-METHYL-2-OXOVALERIC ACID                                                                                                                                                                                    | 0.19458   | -2.3616         | 0.00000188      |
| SUCCINATE                                                                                                                                                                                                     | 0.13912   | -2.8456         | 0.00000423      |
| URIDINE                                                                                                                                                                                                       | 8.9899    | 3.1683          | 0.0000126       |
| UROCANATE                                                                                                                                                                                                     | 0.31556   | -1.664          | 0.0000138       |
| ADENOSINE 3',5'-CYCLIC MONOPHOSPHATE                                                                                                                                                                          | 3.9985    | 1.9995          | 0.00071524      |
| 4-AMINOBUTANOATE                                                                                                                                                                                              | 0.2901    | -1.7854         | 0.0000203       |
| SPERMIDINE                                                                                                                                                                                                    | 0.23804   | -2.0707         | 0.000029        |
| MALATE                                                                                                                                                                                                        | 0.4271    | -1.2274         | 0.0000313       |
| L-GLUTAMIC ACID                                                                                                                                                                                               | 0.4931    | -1.0201         | 0.0000318       |
| XANTHINE                                                                                                                                                                                                      | 0.4216    | -1.2461         | 0.0000336       |
| 5'-DEOXYADENOSINE                                                                                                                                                                                             | 0.26725   | -1.9038         | 0.0000337       |
| GLYCERIC ACID                                                                                                                                                                                                 | 0.26554   | -1.913          | 0.0000418       |
| THYMINE                                                                                                                                                                                                       | 0.2849    | -1.8115         | 0.0000565       |
| L-CYSTEINE                                                                                                                                                                                                    | 0.33837   | -1.5633         | 0.000057        |

|                                           |         |          |           |
|-------------------------------------------|---------|----------|-----------|
| L-ISOLEUCINE                              | 0.44137 | -1.1799  | 0.0000628 |
| DEOXYCYTIDINE                             | 0.21622 | -2.2094  | 0.0000651 |
| L-ISOLEUCINE                              | 0.48835 | -1.034   | 0.000105  |
| GLYCEROL 2-PHOSPHATE                      | 3.3356  | 1.7379   | 0.00013   |
| PHENYLALANINE                             | 0.6316  | -0.66291 | 0.000163  |
| CARNOSINE                                 | 6.9762  | 2.8024   | 0.000195  |
| LEU PRO                                   | 0.59605 | -0.7465  | 0.000215  |
| L-VALINE                                  | 0.34027 | -1.5553  | 0.000236  |
| ORNITHINE                                 | 0.46894 | -1.0925  | 0.000255  |
| ISOCYTOSINE                               | 0.30474 | -1.7143  | 0.00034   |
| NAD                                       | 0.34531 | -1.534   | 0.000393  |
| HEXOSE-6-PHOSPHATE                        | 3.3486  | 1.7436   | 0.000402  |
| L-ALLOTHREONINE                           | 0.45529 | -1.1351  | 0.000405  |
| LL-2,6-DIAMINOHEPTANEDIOATE               | 3.2599  | 1.7048   | 0.000519  |
| GUANOSINE 5'-MONOPHOSPHATE                | 3.7606  | 1.911    | 0.000599  |
| TRYPTOPHAN                                | 0.59829 | -0.74108 | 0.000612  |
| 4-HYDROXYPHENYLACETATE                    | 0.42841 | -1.2229  | 0.000706  |
| D-RIBOSE 5-PHOSPHATE/RIBULOSE 5-PHOSPHATE | 2.5095  | 1.3274   | 0.000893  |
| C6H12O6-HEXOSE/KETOSE/INOSITOL            | 1.9894  | 0.99233  | 0.000965  |
| N-METHYL-D-ASPARTIC ACID                  | 0.53102 | -0.91317 | 0.00097   |
| N-AMIDINO-L-ASPARTATE                     | 0.42812 | -1.2239  | 0.001279  |
| 2'-DEOXYGUANOSINE 5'-MONOPHOSPHATE        | 0.35102 | -1.5104  | 0.001445  |
| AGMATINE SULFATE                          | 0.39292 | -1.3477  | 0.001636  |
| DIHYDROXYACETONE PHOSPHATE                | 0.30507 | -1.7128  | 0.001724  |
| N-ACETYL-L-ASPARTIC ACID                  | 0.40205 | -1.3145  | 0.00188   |
| GLUCOSE/FRUCTOSE                          | 1.647   | 0.71987  | 0.002234  |
| GLYCEROPHOSPHOCHOLINE                     | 0.57286 | -0.80375 | 0.002385  |
| L-LEUCINE                                 | 0.55516 | -0.84902 | 0.002708  |
| 5-HYDROXY-L-TRYPTOPHAN                    | 0.56457 | -0.82478 | 0.002819  |
| N-ACETYL-D-MANNOSAMINE                    | 0.34338 | -1.5421  | 0.003238  |
| PYRIDOXAL                                 | 1.8485  | 0.88638  | 0.003512  |
| C5-SUGAR ALCOHOL                          | 0.26395 | -1.9217  | 0.003803  |
| HEXOSE-DISACCHARIDE                       | 2.4792  | 1.3099   | 0.004097  |
| L-CYSTEINE-S-SULFATE                      | 0.53499 | -0.90241 | 0.004129  |
| 2'-DEOXYCYTIDINE 5'-MONOPHOSPHATE         | 0.34882 | -1.5194  | 0.004296  |
| URACIL                                    | 2.4986  | 1.3211   | 0.004311  |
| ASPARTATE                                 | 0.43927 | -1.1868  | 0.00637   |
| URIDINE-5-MONOPHOSPHATE                   | 2.3499  | 1.2326   | 0.006489  |
| SARCOSINE/BETA-ALANINE                    | 0.31463 | -1.6683  | 0.007887  |
| L-CYSTINE                                 | 0.35465 | -1.4955  | 0.009222  |
| 2-HYDROXYPHENYLALANINE                    | 0.62892 | -0.66905 | 0.010491  |
| S-HEXYL-GLUTATHIONE                       | 0.58792 | -0.76631 | 0.011168  |
| C12H22O11-DISACCHARIDE                    | 1.9253  | 0.94508  | 0.01167   |
| ALANINE                                   | 0.46972 | -1.0901  | 0.012598  |

|                                                           |         |          |          |
|-----------------------------------------------------------|---------|----------|----------|
| D-RIBOSE                                                  | 1.9454  | 0.96006  | 0.013941 |
| D-GLUCURONIC ACID/D-GLUCURONOLACTONE/D--GALACTURONIC ACID | 2.5444  | 1.3473   | 0.01566  |
| L-GLUTAMINE                                               | 0.52277 | -0.93575 | 0.016155 |
| 5-HYDROXYMETHYL-2-FURALDEHYDE                             | 1.58    | 0.65989  | 0.016529 |
| RIBULOSE 5-PHOSPHATE                                      | 1.6469  | 0.71978  | 0.025276 |
| TRYPTOPHAN-NH3                                            | 0.55192 | -0.85748 | 0.027777 |
| 3-SULFINO-L-ALANINE                                       | 0.52686 | -0.9245  | 0.042352 |

| <b>Supplementary Table 4</b>                    |                                    |
|-------------------------------------------------|------------------------------------|
| <b>Gene</b>                                     | <b>RT-qPCR primers</b>             |
| 16sRNA                                          | CCAAGTCGCGTGAAGGAAGA,q16sRNA.Fw    |
|                                                 | CACCGCTGACTTACCGAACA,q16sRNA.Rv    |
| <i>fimA</i>                                     | TTCGGGGCAACACTCGTAAA,qFimA.Fw      |
|                                                 | CCAAGTCGGCTCCGTTTTTC,qFimA.Rv      |
| <i>mfa1</i>                                     | GGAGAACGTGCGCAATACCT,qMfa1.Fw      |
|                                                 | AATCAGCCAAAGTCGGCACT,qMfa1.Rv      |
| <i>sprA</i>                                     | ACTGACGCTGATTCGCAAGA,qPGN.832.Fw   |
|                                                 | ACGGAAGCTGACACCGAAAT,qPGN.832.Rv   |
| <i>ragA</i>                                     | GGCTGAGTGACCTCCGATTC,qPGN.293.Fw   |
|                                                 | CGAGAGCCTGGTGGTTGTAG,qPGN.293.Rv   |
| <i>rhs</i>                                      | CGTGGAAGAAACGCTGTCGG,qPGN.1818.Fw  |
|                                                 | AATCCGTTTCCTCCGGCCTT,qPGN.1818.Rv  |
| Cysteine protease                               | CGCTCAGCAAGAAGGAACGC,qPGN.508.Fw   |
|                                                 | GAGCACCTTGGCCGGTACAT,qPGN.508.Rv   |
| <i>rgpA</i>                                     | TTCCTGACGGAGTGGCAGAC,qPGN.1970.Fw  |
|                                                 | CGTAAGACTTGCCGTCAACGA,qPGN.1970.Rv |
| Na <sup>+</sup> -NQR subunit<br>( <i>nqrB</i> ) | GCGGTTTGGTAGGAGCCTCA,qPGN.115.Fw   |
|                                                 | CCCGGATTGAGCACTCGGAT,qPGN.115.Rv   |



**Supplementary Table 5-**16S rRNA gene primers used in quantification of individual population within multispecies biofilms

| <b>Species</b>                 | <b>16S rRNA gene primers</b> |                           |
|--------------------------------|------------------------------|---------------------------|
|                                | <b>Forward</b>               | <b>Reverse</b>            |
| <i>P. gingivalis</i> 381       | GGTGCGTAGGTTGTTCCGGTA        | TCCTGTTTGATACCCACGCC      |
| <i>S. gordonii</i> DL1         | ATTGCATCACTACCAGA            | TGCTCGGTCAGACTTTCGTC      |
| <i>P. intermedia</i> strain 17 | CCATCAGGTTATGCTGGGCA         | GTTGCAGACCTCAGTCCGAA      |
| <i>T. forsythia</i> ATCC 43037 | AGGATGACTGCCCTATGGGT         | AAGCGACAAACTTTCACCGC      |
| <i>F. alocis</i> ATCC 35896    | ACCCTCAAGTTGCCAAAATTATTAT    | TACTCCCTTTCTTCTGGTTAAATCT |
